# Supplementary material
Source: ML conference proceedings conference paper supplement (https://proceedings.mlr.press/v164/walker22a.html)
Supplement: Supplementary file 2 [file walker22a-supp.zip]

Archive with 3 entries (2 files):
- influencing-behavioral-attributions-supplement/
- influencing-behavioral-attributions-supplement/README.md
- influencing-behavioral-attributions-supplement/appendices.pdf
